# Supplementary material for: Metformin reveals a mitochondrial copper addiction of mesenchymal cancer cells
Source: PubMed Central journal article supplement (PMC6219783; doi:10.1371/journal.pone.0206764), 2018-11-06

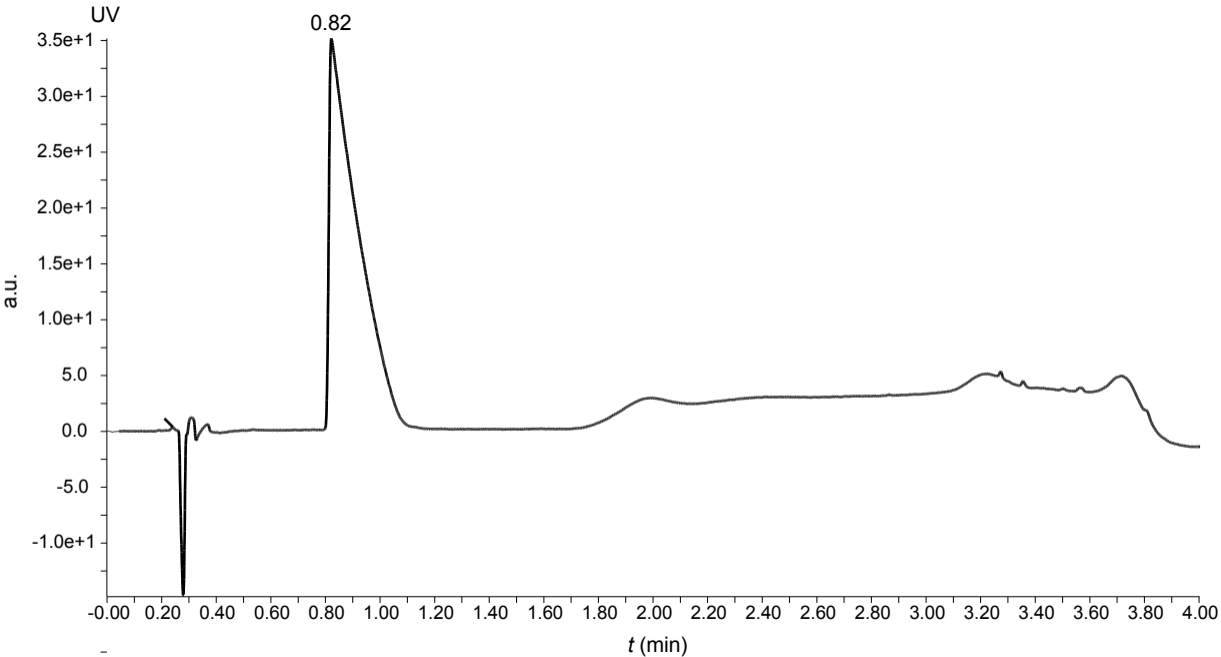

Supplement: pone.0206764.s003.pdf [file pone.0206764.s003.pdf]
